# Supplementary material for: The Severity of Pain in Prostate Biopsy Depends on the Biopsy Sector
Source: MDPI journal article supplement (doi:10.3390/jpm13030431), 2023-02-27
Supplement: s1 [file s1]

## Patient survey

Patient data:.....  
.....  
.....

A. Answer the questions below using the pain scale.

|         |   |      |   |          |   |        |   |                 |   |    |
|---------|---|------|---|----------|---|--------|---|-----------------|---|----|
| 0       | 1 | 2    | 3 | 4        | 5 | 6      | 7 | 8               | 9 | 10 |
| No pain |   | Mild |   | Moderate |   | Strong |   | Unbearable pain |   |    |

1. How would you rate the pain throughout the procedure?.....0 1 2 3 4 5 6 7 8 9 10
2. How would you rate the pain during digital rectal examination?.....0 1 2 3 4 5 6 7 8 9 10
3. How will you rate the pain while inserting the ultrasound probe into the rectum?.....0 1 2 3 4 5 6 7 8 9 10
4. How would you rate the pain during the administration of anesthesia? .....0 1 2 3 4 5 6 7 8 9 10
5. How would you rate the pain during maneuvering?.....0 1 2 3 4 5 6 7 8 9 10
6. How would you rate the pain while taking the samples? .....0 1 2 3 4 5 6 7 8 9 10

B. How anxious or tense were you at the time of the biopsy? (scale of anxiety)

|                                                                |
|----------------------------------------------------------------|
| 0.....1.....2.....3.....4.....5.....6.....7.....8.....9.....10 |
| No anxiety Unbearable anxiety                                  |

C. What discomfort did you feel during the biopsy? (scale of discomfort)

|                                                                |
|----------------------------------------------------------------|
| 0.....1.....2.....3.....4.....5.....6.....7.....8.....9.....10 |
| No discomfort Severe discomfort                                |

D. If there was a medical need for a repeat biopsy, how much would you be inclined to undergo a repeat biopsy? (tolerance scale)

|                                                                |
|----------------------------------------------------------------|
| 0.....1.....2.....3.....4.....5.....6.....7.....8.....9.....10 |
| Very willingly Never                                           |
