# Supplementary figures and images for: The Severity of Pain in Prostate Biopsy Depends on the Biopsy Sector
Source: MDPI journal article supplement (doi:10.3390/jpm13030431), 2023-02-27

PZ  
 CZ  
 TZ  
 US  
 AFS

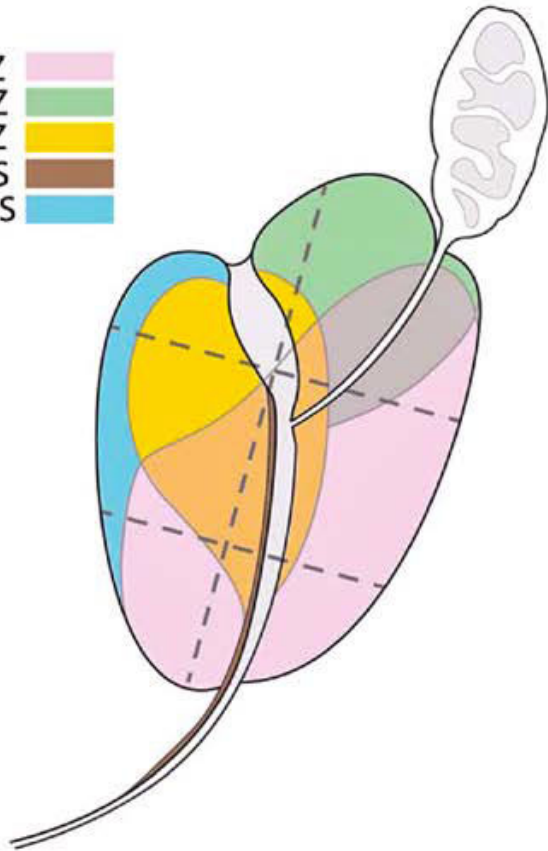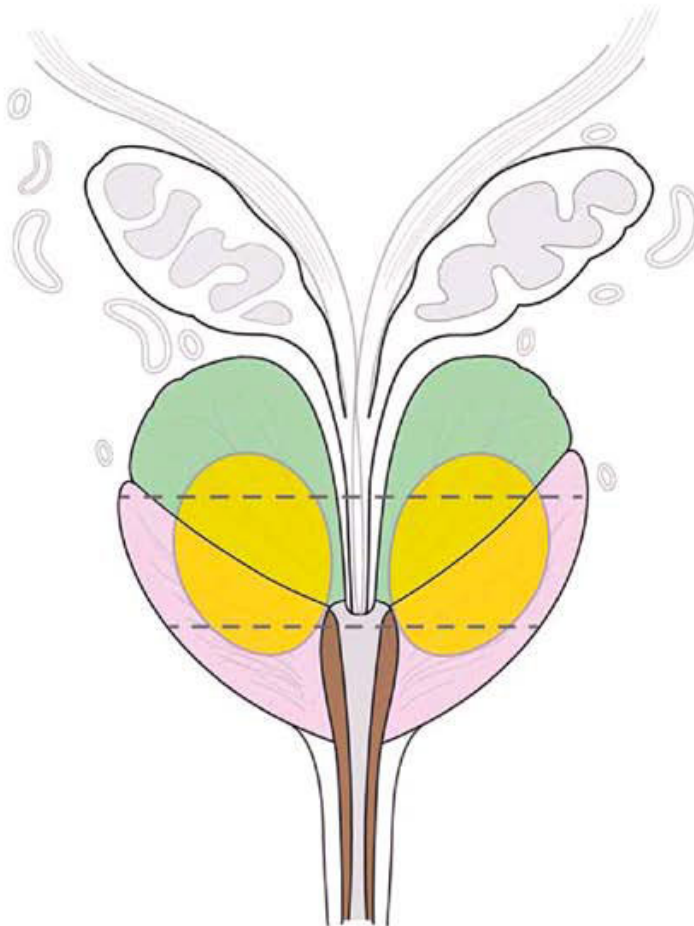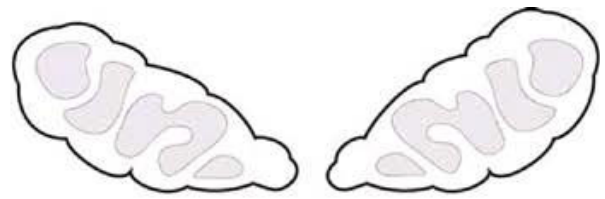

Seminal Vesicles

R

L

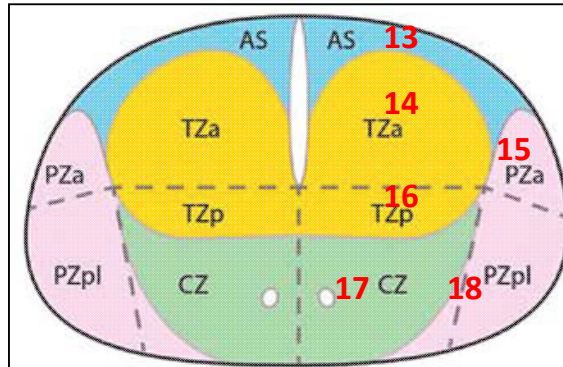

Base

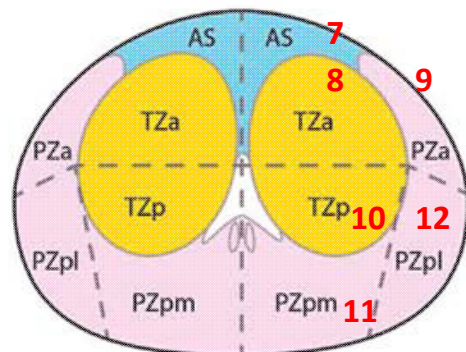

Mid

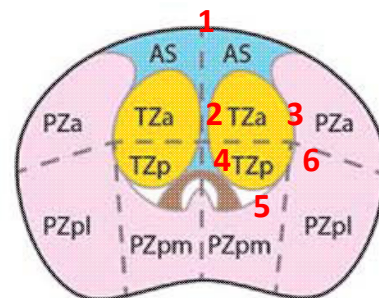

Apex

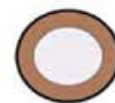

Urethra

Supplement: s1 [file s1]
